# Supplementary material
Source: HighWire-hosted journal article supplement (https://erj.ersjournals.com/content/56/1/1901965)
Supplement: inline-supplementary-material-1 [file inline-supplementary-material-1.pdf]

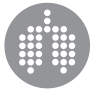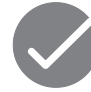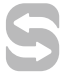

SHAREABLE PDF

# Quantitative analysis of airway obstruction in lymphangiomyomatosis

Stijn E. Verleden<sup>1,9</sup>, Arno Vanstapel<sup>1,9</sup>, Laurens De Sadeleer<sup>1</sup>, Birgit Weynand<sup>2</sup>, Matthieu Boone<sup>3</sup>, Erik Verbeken<sup>2</sup>, Davide Piloni<sup>4</sup>, Dirk Van Raemdonck<sup>5</sup>, Maximilian Ackermann<sup>6,8</sup>, Danny D. Jonigk<sup>7</sup>, Johny Verschakelen<sup>2</sup> and Wim A. Wuyts<sup>1</sup>

**Affiliations:** <sup>1</sup>Respiratory Diseases, Dept of Chronic Diseases, Metabolism and Aging, KU Leuven, Leuven, Belgium. <sup>2</sup>Dept of Imaging, KU Leuven, Leuven, Belgium. <sup>3</sup>Dept of Physics and Astronomy, Radiation Physics-Centre for X-ray Tomography, Ghent University, Ghent, Belgium. <sup>4</sup>The Respiratory Disease Unit, Fondazione IRCCS Policlinico San Matteo, University of Pavia, Pavia, Italy. <sup>5</sup>Thoracic Surgery, Dept of Chronic Diseases, Metabolism and Aging, KU Leuven, Leuven, Belgium. <sup>6</sup>Institute of Functional and Clinical Anatomy, University Medical Center of the Johannes Gutenberg-University Mainz, Mainz, Germany. <sup>7</sup>Institute of Pathology, Hannover Medical School, Hannover, Germany. <sup>8</sup>Institute of Pathology and Molecular Pathology, Helios University Hospital Wuppertal, Witten-Herdecke University, Wuppertal, Germany. <sup>9</sup>Both authors contributed equally.

**Correspondence:** Stijn E. Verleden, KU Leuven, Lung Transplantation Unit, 49 Herestraat, B-3000 Leuven, Belgium. E-mail: [stijn.verleden@med.kuleuven.be](mailto:stijn.verleden@med.kuleuven.be)

 @ERSpublications

**This study demonstrates a 4-fold reduction in the number of airways and terminal bronchioles in end-stage LAM lungs using a combination of CT, microCT and histopathology, compared to a matched control group** <http://bit.ly/2tBTiJy>

**Cite this article as:** Verleden SE, Vanstapel A, De Sadeleer L, *et al.* Quantitative analysis of airway obstruction in lymphangiomyomatosis. *Eur Respir J* 2020; 56: 1901965 [<https://doi.org/10.1183/13993003.01965-2019>].

This single-page version can be shared freely online.

**ABSTRACT** Lymphangiomyomatosis (LAM) is a rare, cystic lung disease with progressive pulmonary function loss caused by progressively proliferating LAM cells. The degree of airway obstruction has not been well investigated within the pathogenesis of LAM.

Using a combination of *ex vivo* computed tomography (CT), microCT and histology, the site and nature of airway obstruction in LAM explant lungs was compared with matched control lungs (n=5 each). The total number of airways per generation, total airway counts, terminal bronchioles number and surface density were compared in LAM *versus* control.

*Ex vivo* CT analysis demonstrated a reduced number of airways from generation 7 on (p<0.0001) in LAM compared with control, whereas whole-lung microCT analysis confirmed the three- to four-fold reduction in the number of airways. Specimen microCT analysis further demonstrated a four-fold decrease in the number of terminal bronchioles (p=0.0079) and a decreased surface density (p=0.0079). Serial microCT and histology images directly showed the loss of functional airways by collapse of airways on the cysts and filling of the airway by exudate.

LAM lungs show a three- to four-fold decrease in the number of (small) airways, caused by cystic destruction which is the likely culprit for the progressive loss of pulmonary function.
